# Supplementary material
Source: ML conference proceedings conference paper supplement (https://openaccess.thecvf.com/content/WACV2022/html/Maman_Typenet_Towards_Camera_WACV_2022_paper.html)
Supplement: Supplementary file 1 [file Maman_Typenet_Towards_Camera_WACV_2022_supplemental.zip]

Archive with 2 entries (2 files):
- 0432-supp.mp4
- 0432-supp.pdf
